# Supplementary material for: 46, XY disorder of sex development (DSD) complicated by a serous borderline tumor of the ovary: a case report and review of the literature
Source: Springer Nature journal article supplement (doi:10.1186/s13000-020-01010-1), 2020-07-23

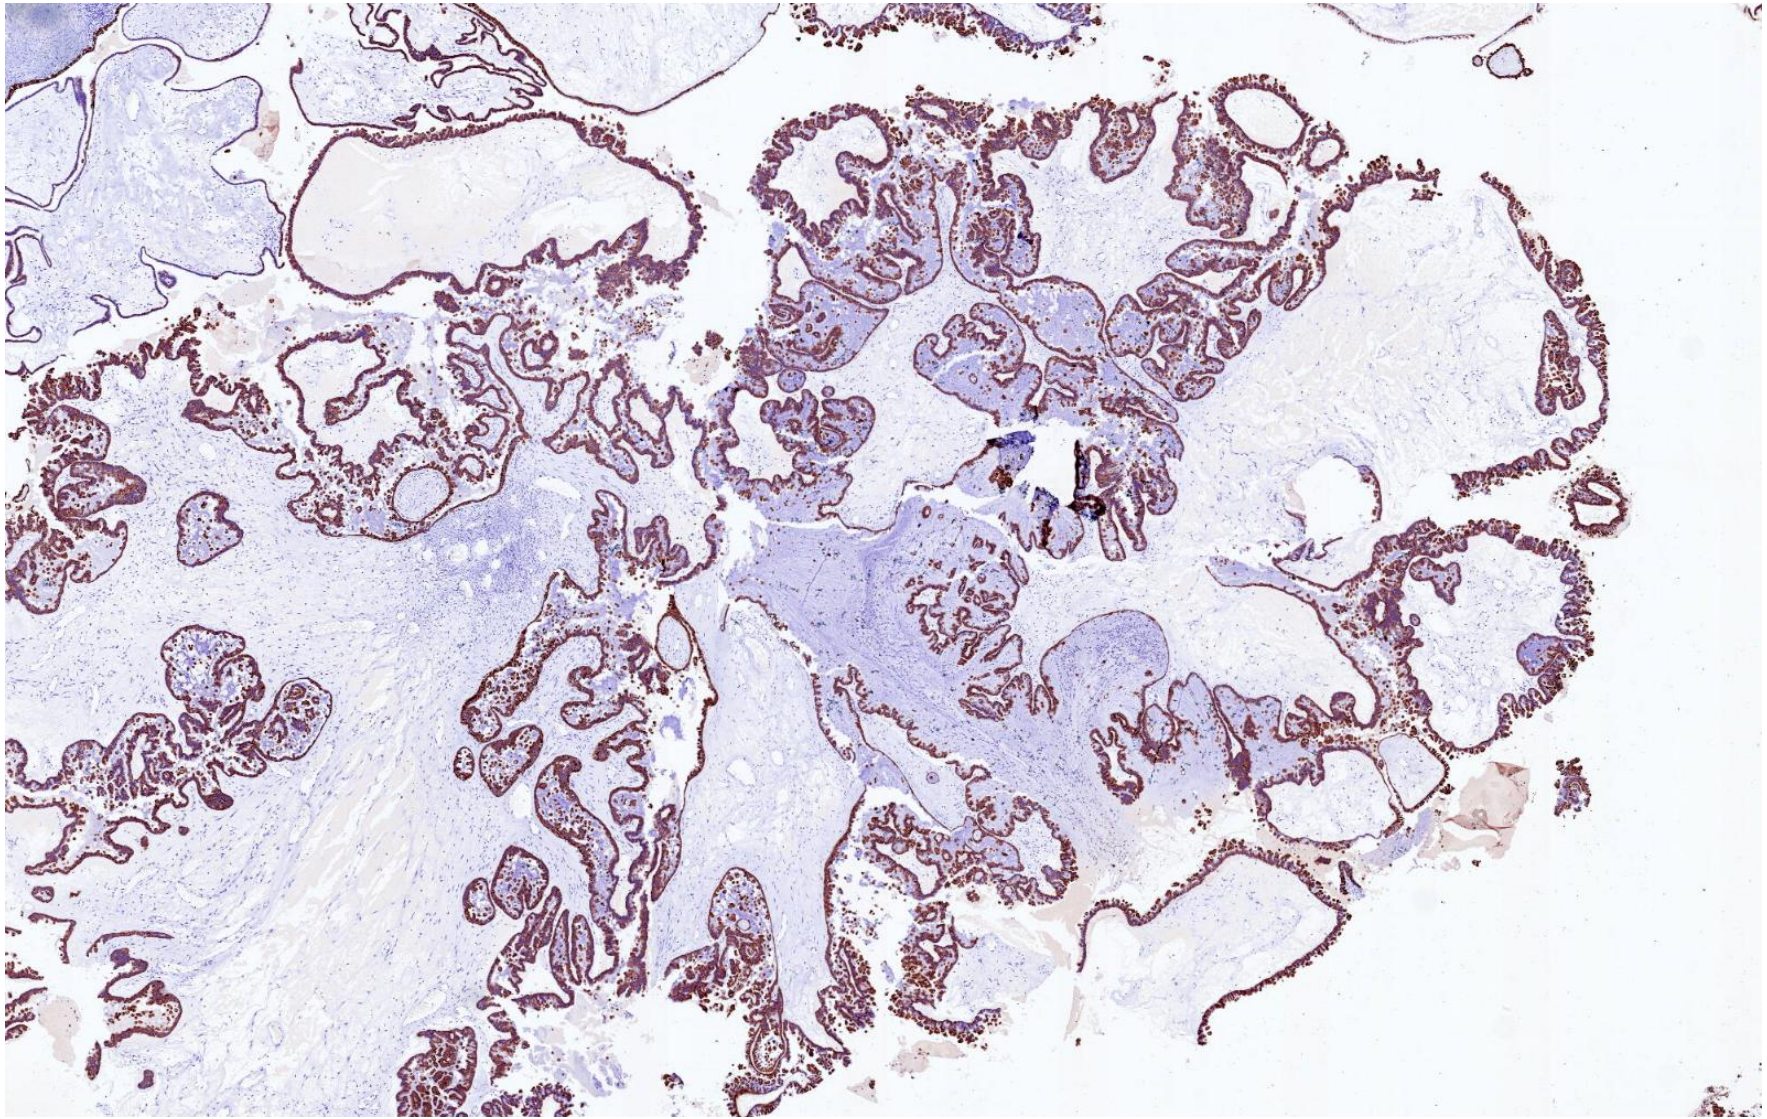



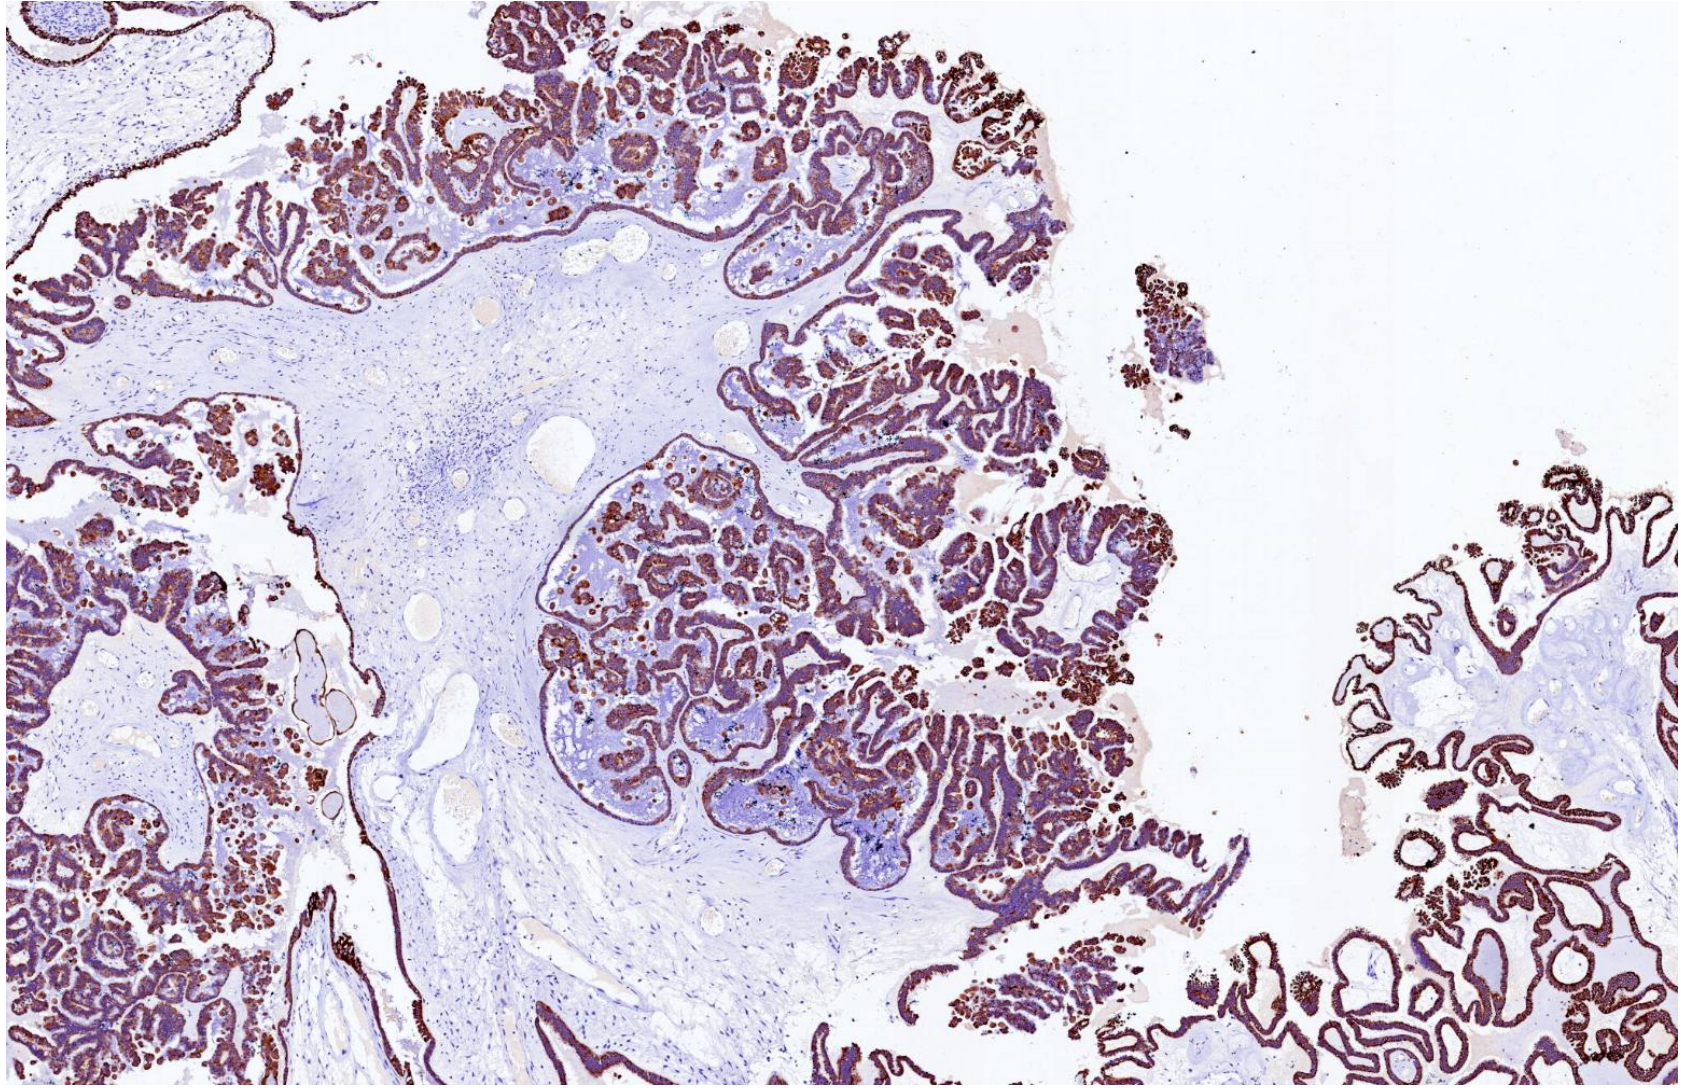



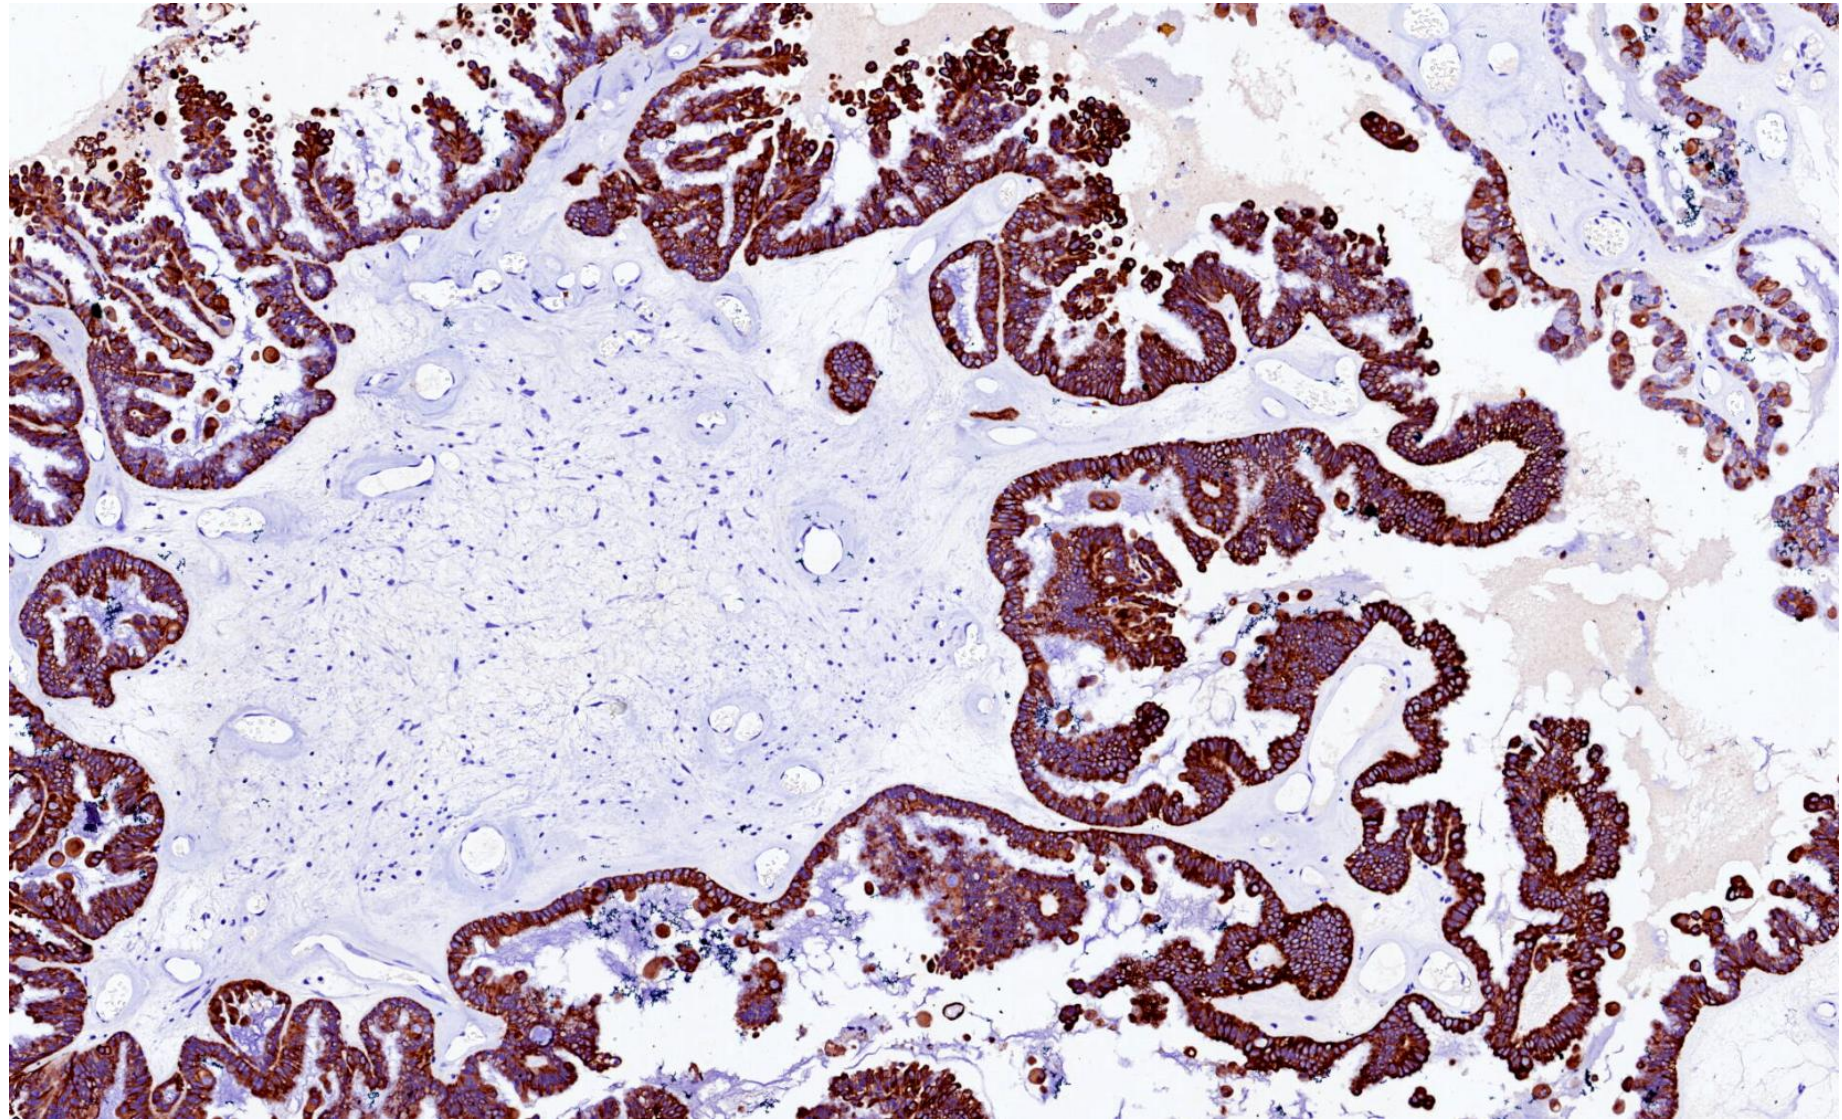



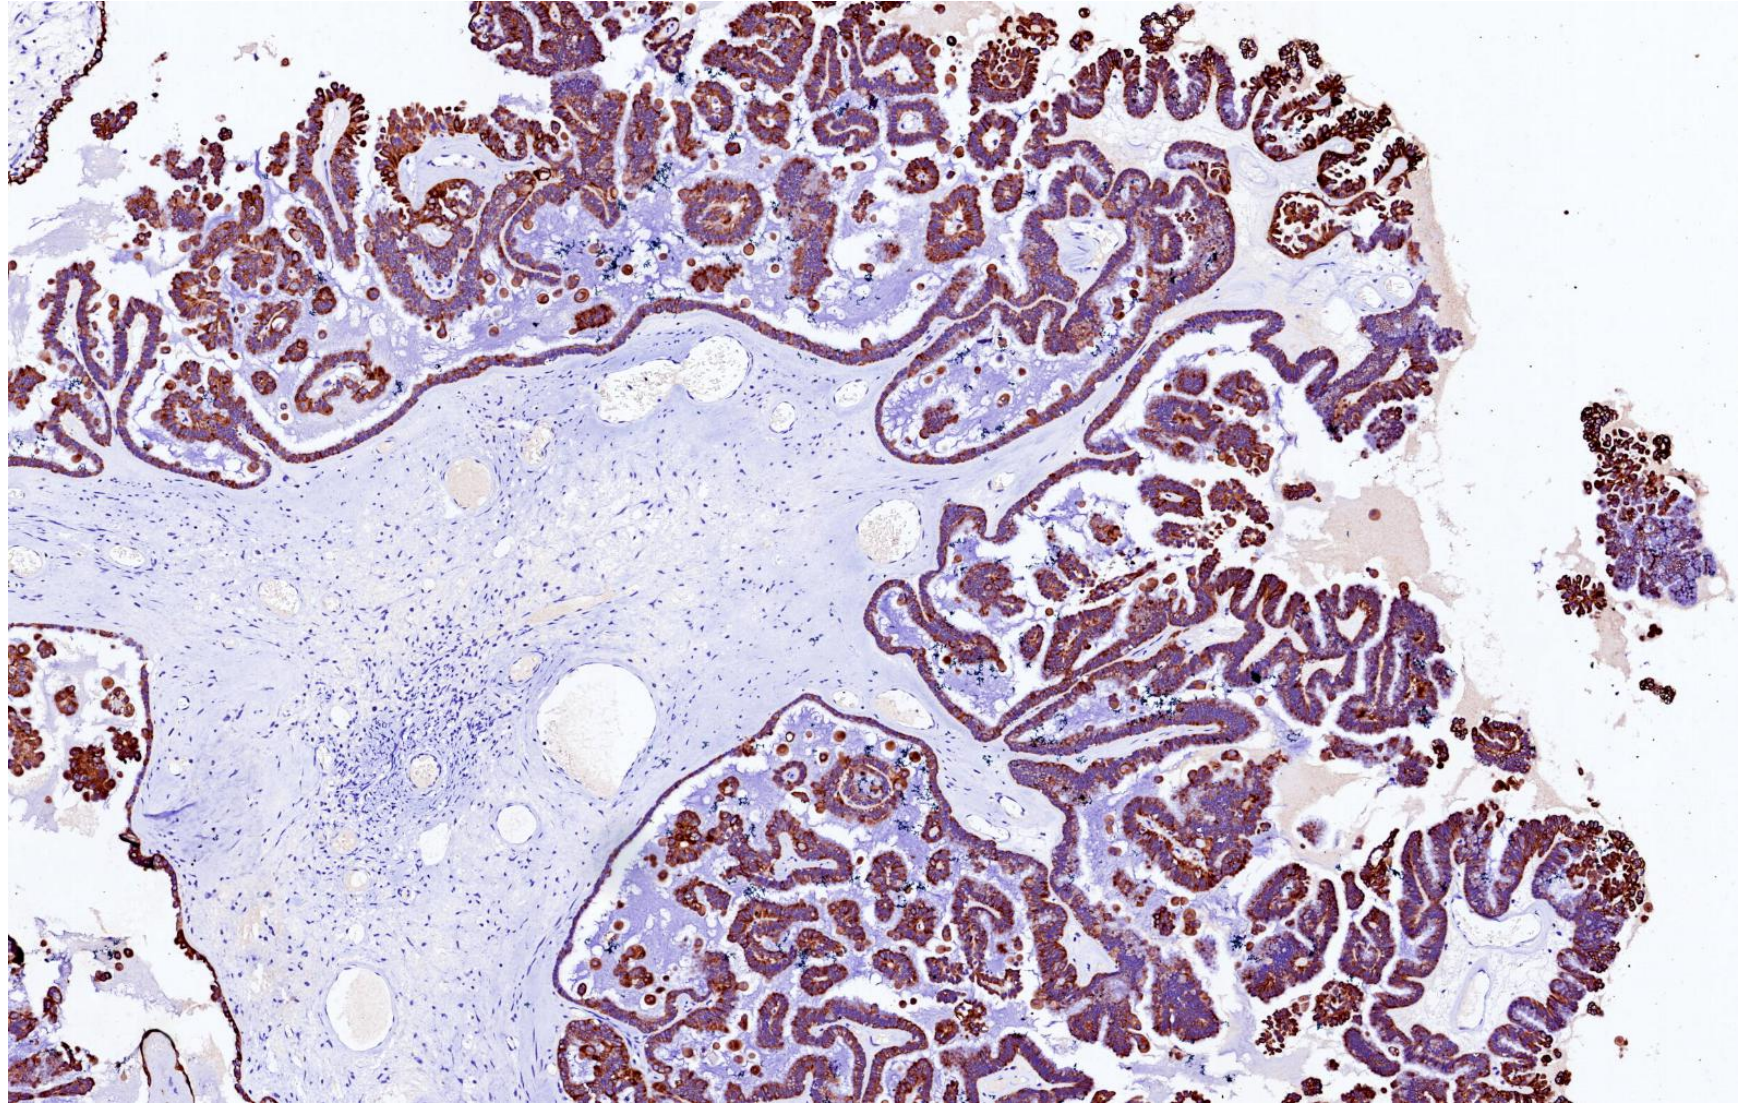



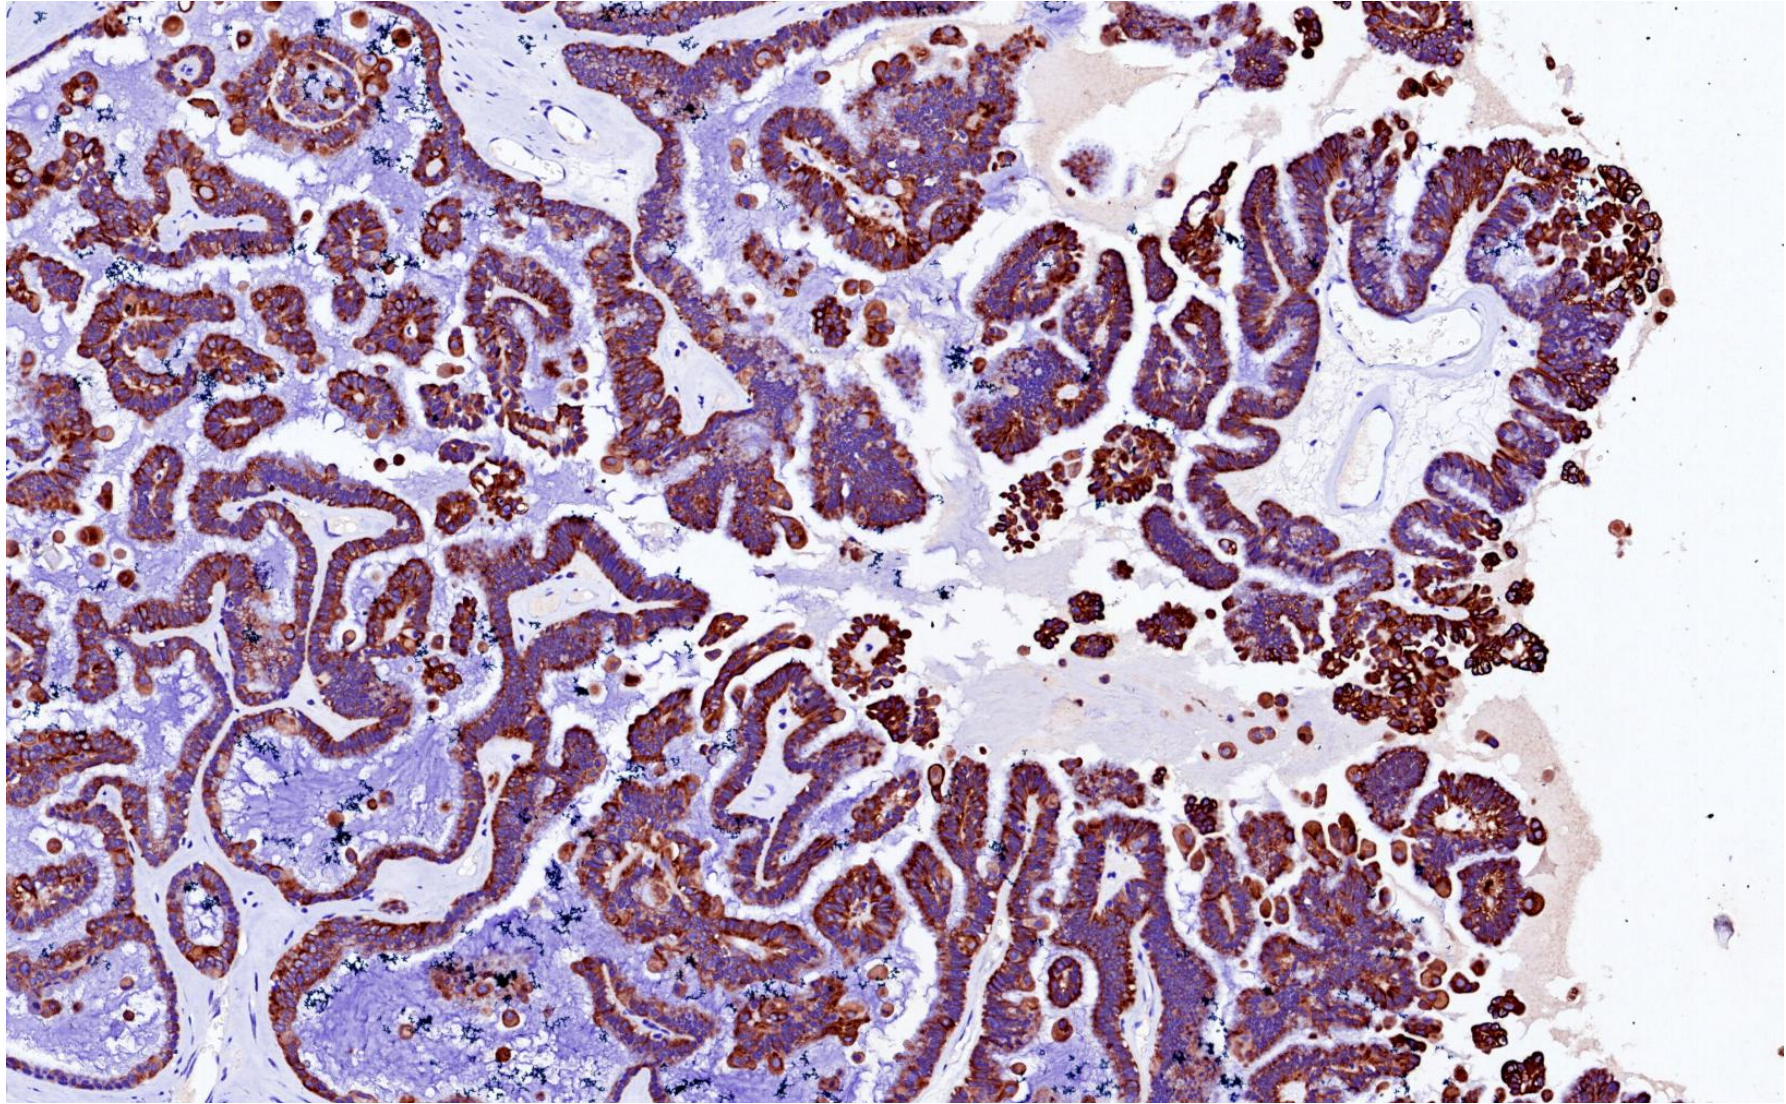



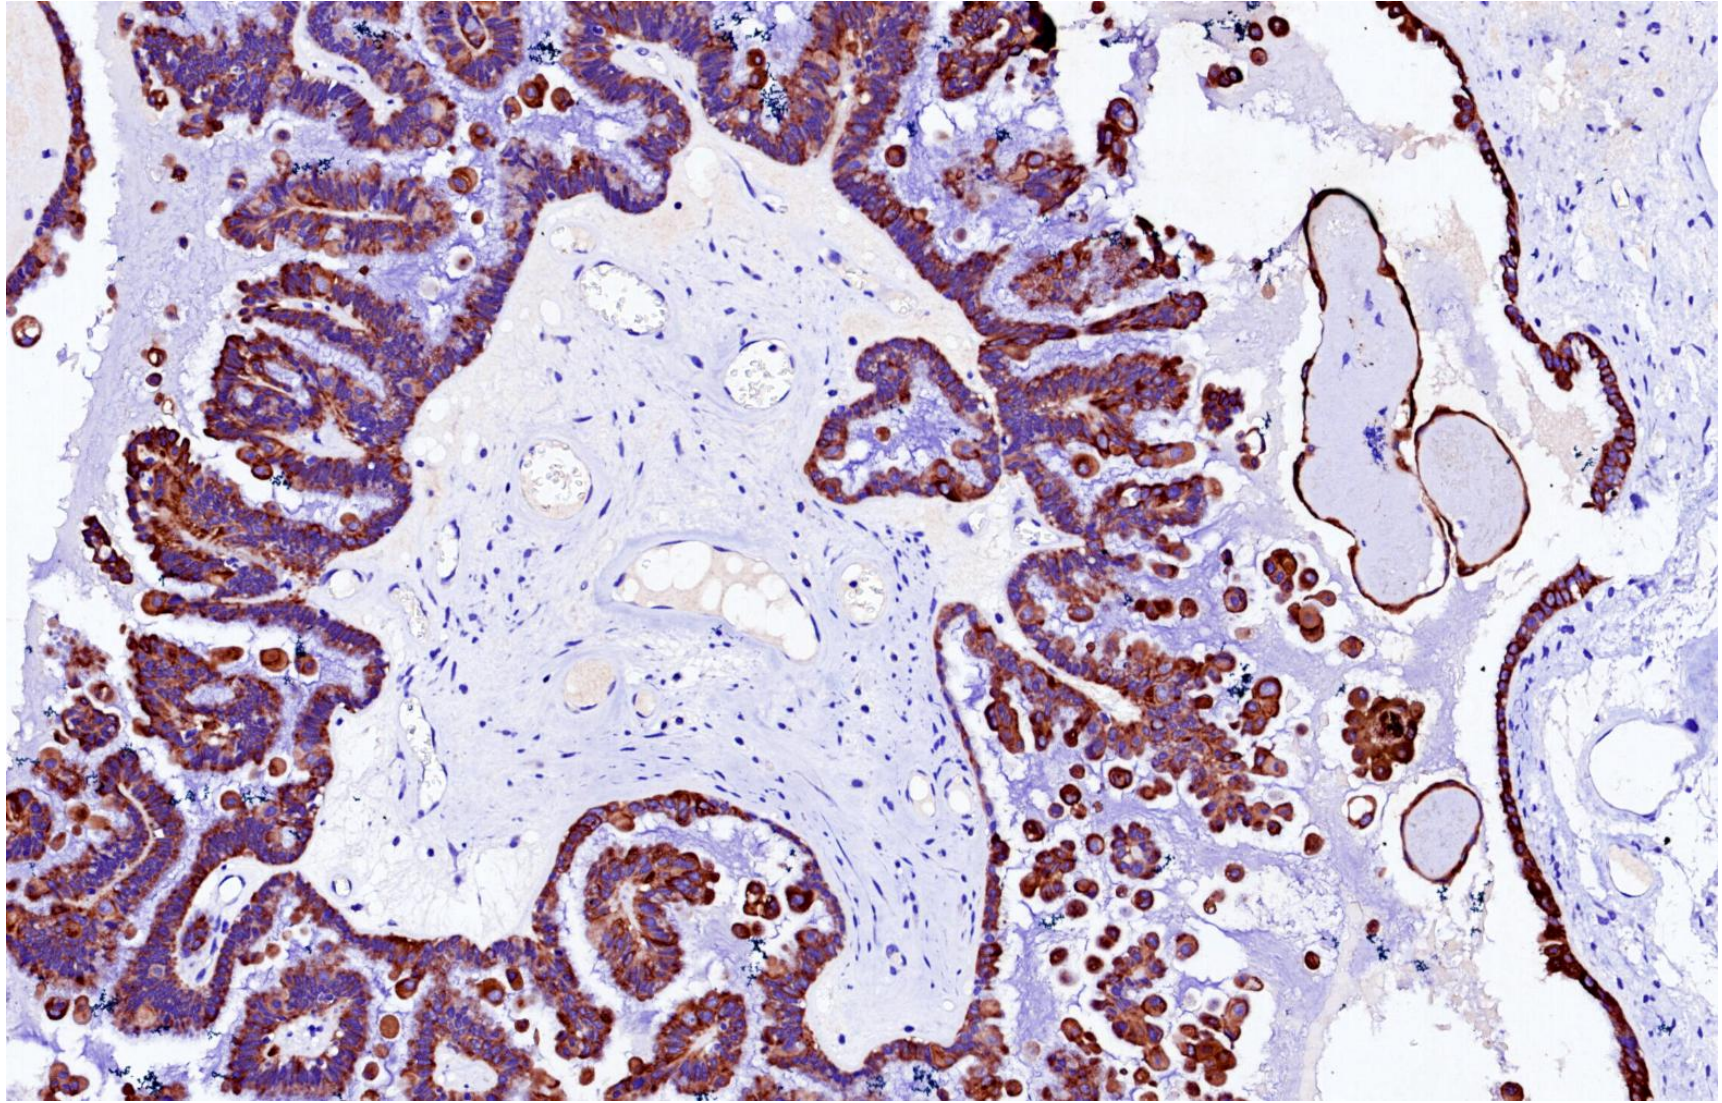

Supplement: MOESM1 [file 18210240]
